# Supplementary material for: Action of CMG with strand-specific DNA blocks supports an internal unwinding mode for the eukaryotic replicative helicase
Source: eLife journal article supplement (doi:10.7554/elife.23449), 2017-03-27
Supplement: supp [file elife-23449-supp-v1.zip]

Fig 3 – Supplement 1: Schematics of biotinylated DNA fork substrates

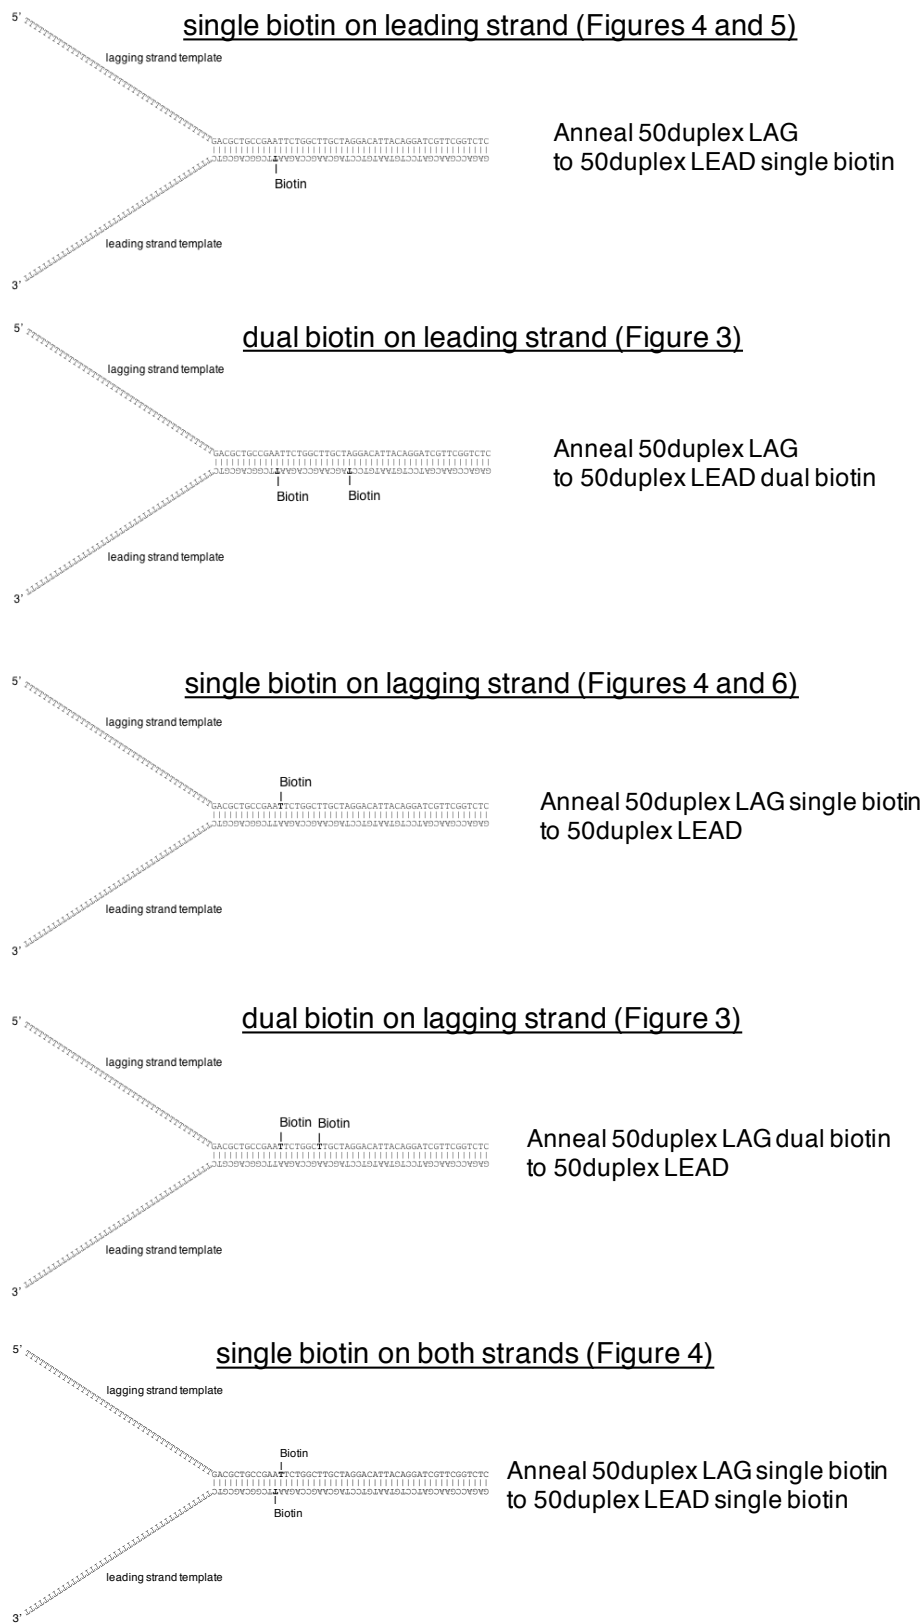

Figure 3 – Supplement 1: **Schematics of biotinylated DNA fork substrates.**  
The fork substrates used in the experiments in Figures 3-6 are shown including the location of the biotinylated dT nucleotides in either the leading or lagging strand template. The oligos used to make the forked duplex substrates are indicated to the right of the schematics and the oligo sequences and modifications are in Table I.
