# Supplementary material for: Action of CMG with strand-specific DNA blocks supports an internal unwinding mode for the eukaryotic replicative helicase
Source: eLife journal article supplement (doi:10.7554/elife.23449), 2017-03-27
Supplement: supp [file elife-23449-supp-v1.zip]

# Fig 3 – Supplement 5: Streptavidin does not affect CMG unwinding of non-biotinylated substrate

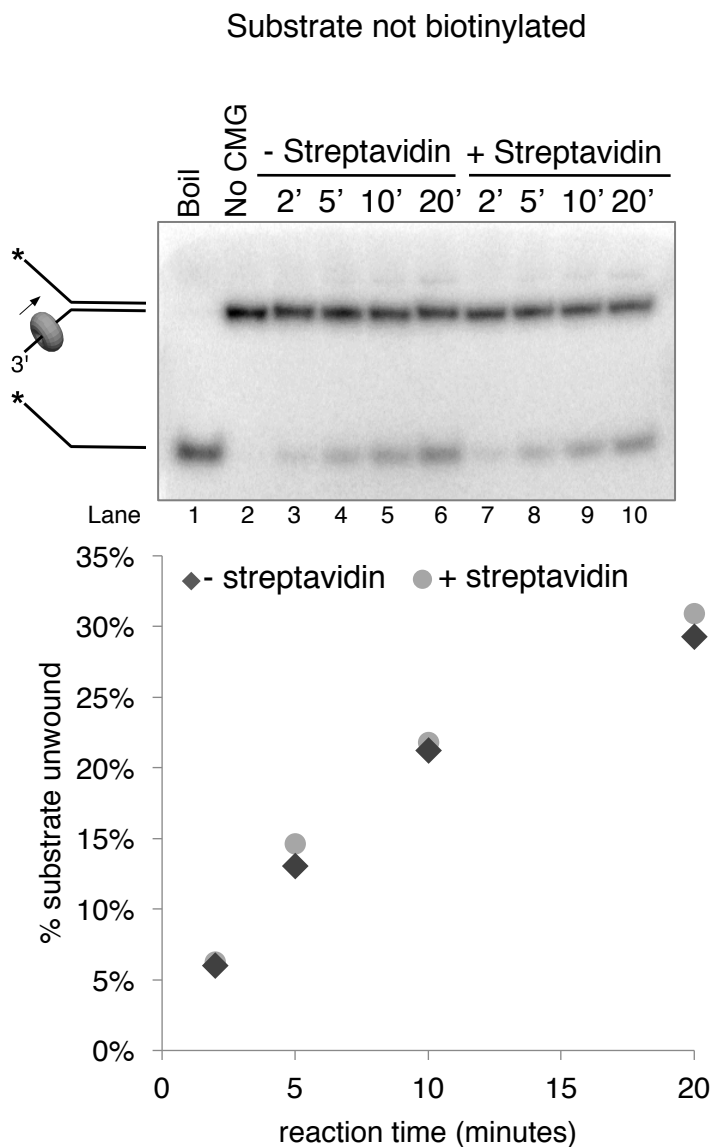

Figure 3 – Supplement 5: **Streptavidin does not affect CMG unwinding of a non-biotinylated substrate.**

As a control to determine whether addition of streptavidin affects CMG unwinding of a non-biotinylated substrate (i.e. non-specific inhibition of unwinding), we compared CMG unwinding of a non-biotinylated substrate in the absence (lanes 3-6) and presence (lanes 7-10) of streptavidin. Reactions conditions were identical to those in Figure 3 – Supplement 2 except for the addition of 2  $\mu\text{g/ml}$  (final concentration) streptavidin to the reaction in lanes 7-10; the total reaction volume was 60  $\mu\text{l}$  and 12  $\mu\text{l}$  time points were taken over a time course out to 20'. As shown in the graph at bottom, the amount of substrate unwound was identical in the absence and presence of streptavidin when the substrate was not biotinylated.
