# Supplementary material for: Action of CMG with strand-specific DNA blocks supports an internal unwinding mode for the eukaryotic replicative helicase
Source: eLife journal article supplement (doi:10.7554/elife.23449), 2017-03-27
Supplement: supp [file elife-23449-supp-v1.zip]

**Fig 3 – Supplement 4: Biotinylation of the substrate does not affect CMG unwinding in the absence of streptavidin**

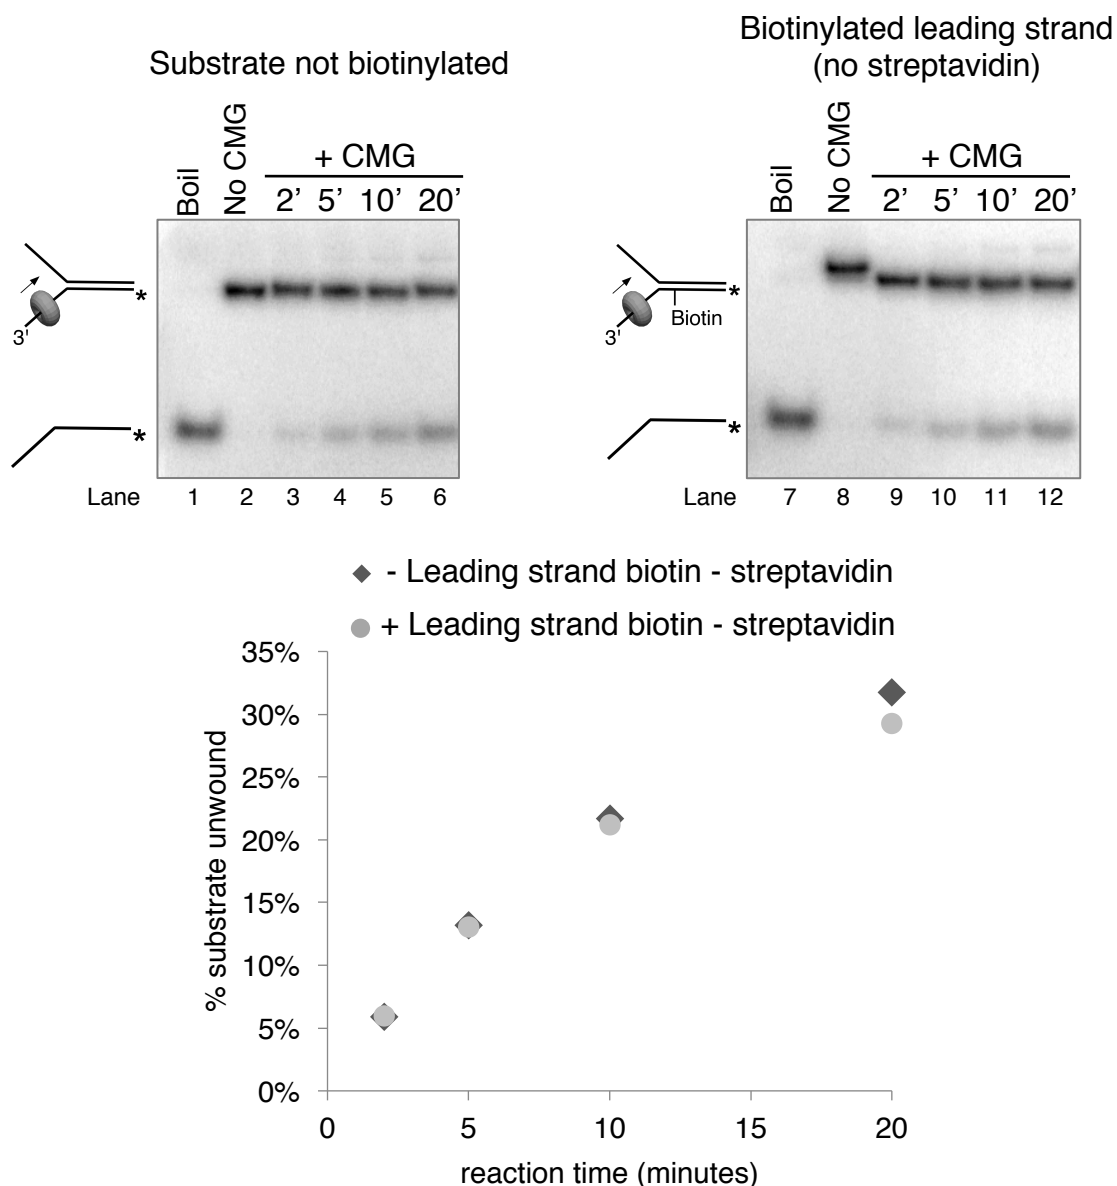

**Figure 3 – Supplement 4: Biotinylation of the substrate does not affect CMG unwinding in the absence of streptavidin.**

As a control to determine whether the biotin modification on the substrate affects CMG unwinding in the absence of streptavidin, we compared CMG unwinding of a non-biotinylated substrate (lanes 3-6) to that of the substrate with biotin on the leading strand template (lanes 9-12). Reactions conditions were identical to those in Figure 3 – Supplement 2 except the total reaction volume was 60  $\mu$ l and 12  $\mu$ l time points were taken over a time course out to 20'. As shown in the graph at bottom, the amount of substrate unwound was identical in the absence and presence of the biotin modification.
