# Supplementary material for: Action of CMG with strand-specific DNA blocks supports an internal unwinding mode for the eukaryotic replicative helicase
Source: eLife journal article supplement (doi:10.7554/elife.23449), 2017-03-27
Supplement: supp [file elife-23449-supp-v1.zip]

Fig 6 – Supplement 2: Helicase reactions by CMG on a single lagging strand biotinylated fork using two concentrations of CMG

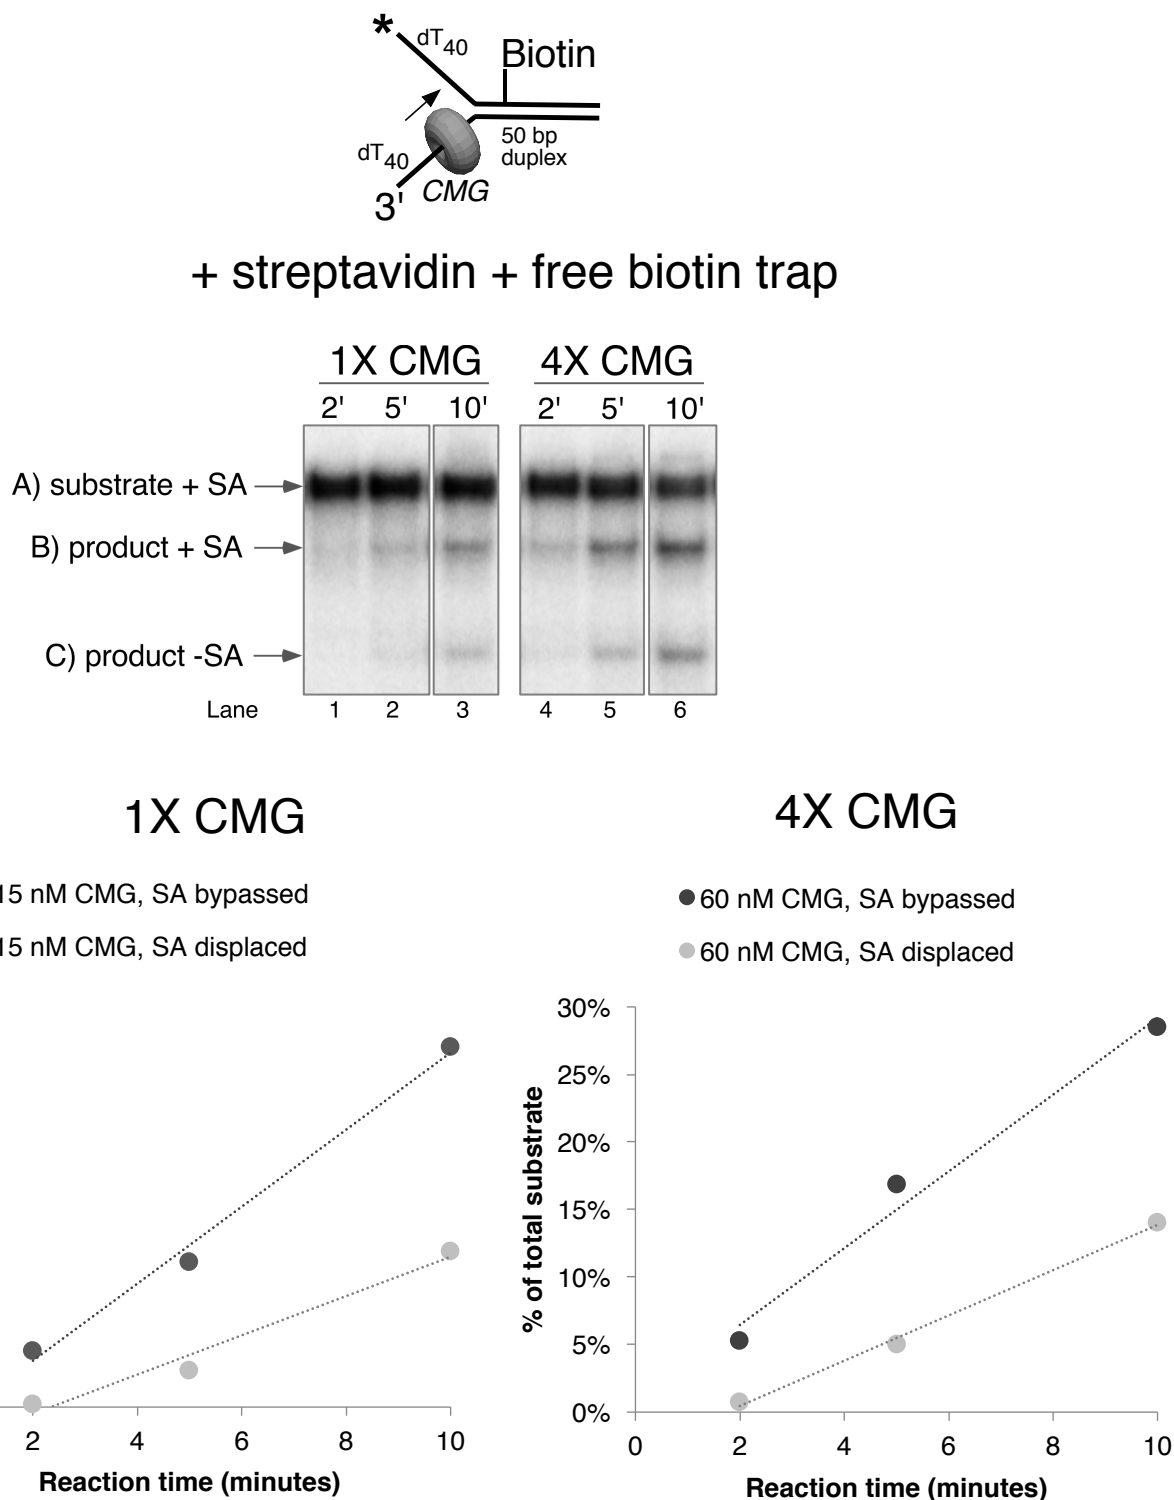

Figure 6 – Supplement 2. **Helicase reactions by CMG on a single lagging strand biotinylated fork using two concentrations of CMG.** The reaction from lanes 7-9 in Figure 6A (with streptavidin and the free biotin trap) was repeated at two different concentrations of CMG and the results are shown in the gels at the top. Below the gels are plots of the two individual products that form, product with streptavidin bound, and products without streptavidin bound (streptavidin displaced).
