# Supplementary material for: Action of CMG with strand-specific DNA blocks supports an internal unwinding mode for the eukaryotic replicative helicase
Source: eLife journal article supplement (doi:10.7554/elife.23449), 2017-03-27
Supplement: supp [file elife-23449-supp-v1.zip]

Fig 2 - Supplement 2: Repeat of Experiment from Fig. 2B in the presence of a trap to prevent reannealing of flush duplex oligo

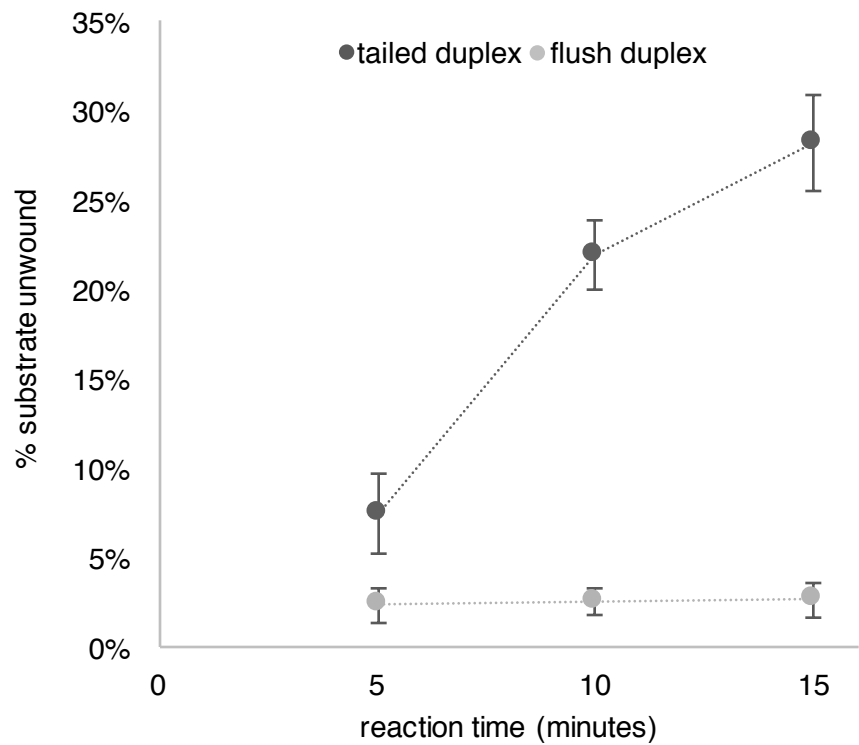

Figure 2 – Supplement 2: **Repeat of Experiment from Fig. 2B in the presence of a trap to prevent reannealing of flush duplex oligo.**

The experiment from Figure 2B was repeated exactly as described in the Figure Legend except that 2 minutes after the reaction was started, a 40-fold excess of unlabeled flush duplex oligo was added (to a final concentration of 20 nM) to prevent reannealing of any unwound radiolabeled flush duplex oligo (0.5 nM). This experiment supports the conclusion of Figure 2 that CMG translocates over flush duplex without unwinding.
